# Supplementary material for: Where the Little Ones Play the Main Role—Picophytoplankton Predominance in the Soda and Hypersaline Lakes of the Carpathian Basin
Source: MDPI journal article supplement (doi:10.3390/microorganisms10040818), 2022-04-14
Supplement: s1 [file s1]

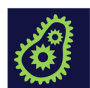

# Supplementary materials

**Table S1.** List of published papers on APP in soda and hypersaline lakes of the Carpathian Basin. Abbreviations: TS – Turbid soda lakes, HS – Humic soda lakes, H – Hypersaline lakes, NGS - next-generation DNA sequencing.

| Publication               | Data type                                                                                          | Lake Category | Time period     | Use in present study*     |
|---------------------------|----------------------------------------------------------------------------------------------------|---------------|-----------------|---------------------------|
| Vörös & V.-. Balogh, 2003 | APP abundance, contribution                                                                        | TS            | 2000            | -                         |
| Vörös et al. 2005         | APP abundance, contribution                                                                        | TS            | 2001            | Figure 1, Table 1         |
| Vörös et al. 2008         | APP abundance                                                                                      | TS            | 2002, 2004      | Figure 1, Table 1         |
| Somogyi et al. 2009a      | APP abundance                                                                                      | TS            | 2006-2007       | Figure 1, Table 1         |
| Felföldi et al. 2009      | APP abundance, DGGE and cloning of environmental samples                                           | TS, HS        | 2003-2005       | Figures 1, 4; Tables 1, 3 |
| Somogyi et al. 2010       | APP abundance, contribution, cloning of environmental samples                                      | TS, HS        | 2004            | Figures 1, 4; Tables 1, 3 |
| Somogyi et al. 2011a      | APP abundance, contribution                                                                        | TS, HS        | 2008-2009       | Figure 1, Table 1         |
| Somogyi et al. 2011b      | New species description                                                                            | TS            | 2006            | Figure 4, Table 3         |
| Felföldi et al. 2011      | DNA analysis (isolated strains)                                                                    | TS            | 2006            | Figure 4, Table 3         |
| Somogyi et al. 2012       | DNA analysis (isolated strains)                                                                    | TS            | 2005-2006       | Table 3                   |
| Keresztes et al. 2012     | DGGE of environmental samples                                                                      | H             | 2010            | Figure 4, Table 3         |
| Somogyi et al. 2013       | DNA analysis (isolated strains)                                                                    | TS            | 2005            | Figure 4, Table 3         |
| Somogyi et al. 2014       | APP abundance, contribution                                                                        | H             | 2010, 2011      | Figure 1, Table 1         |
| Pálffy et al. 2014        | APP abundance, photosynthesis, Cloning of environmental samples                                    | TS            | 2012            | Figure 1, Tables 1, 3     |
| Máthé et al. 2014         | DGGE of environmental samples                                                                      | H             | 2009            | Table 3                   |
| Mentes et al. 2014        | APP abundance, Cloning of environmental samples                                                    | H             | 2010            | Table 3                   |
| Somogyi et al., 2016      | APP abundance, photosynthesis, DNA analysis (isolated strains)                                     | TS, HS        | 2012, 2014      | Figure 1, Table 1         |
| Korponai et al. 2015      | APP biomass, contribution                                                                          | TS, HS        | 2013-2014       | Figure 1, Table 1         |
| Felföldi et al. 2016      | APP abundance, DGGE of environmental samples                                                       | H             | 2013            |                           |
| Szabó et al. 2017         | NGS of environmental samples                                                                       | TS, HS        | 2012            |                           |
| Somogyi et al. 2017       | APP biomass, contribution combination of microscopic cell counts with NGS of environmental samples | TS, HS        | 2008-2009, 2013 | Figure 1, Table 1         |
| Felföldi 2020             |                                                                                                    | TS            | 2013-2014       | -                         |
| Szabó et al. 2020         | APP abundance, NGS of environmental samples                                                        | TS, HS        | 2013-2014       | Figure 4, Table 3         |

\* all data are used in the text.

**Table S2.** List of investigated lakes, sampling strategy and selected Limnological characteristics. Abbreviations: H – Hungary, A – Austria, R – Romania, S – Serbia, EC – Electric conductivity, O – occasional sampling, R – regular sampling.

| Lake      | Category | Coordinates    | Sampling strategy          | Surface     | Mean depth | EC                     |      | pH     |      |          |     |
|-----------|----------|----------------|----------------------------|-------------|------------|------------------------|------|--------|------|----------|-----|
|           |          |                |                            |             |            | range                  | mean | range  | mean |          |     |
|           |          |                |                            | (ha)        | (cm)       | (mS cm <sup>-1</sup> ) |      |        |      |          |     |
| L. Cabdic | R        | Hyper-saline 1 | N47°07.712'<br>E23°51.900' | 2010 – 2011 | O (n= 5)   | 0.15                   | 890  | 84-195 | 97   | 7.3-8..9 | 7.9 |

|                         |     |                |                            |                                 |           |       |      |          |     |          |      |
|-------------------------|-----|----------------|----------------------------|---------------------------------|-----------|-------|------|----------|-----|----------|------|
| L. Băilor               | R   | Hyper-saline 2 | N46°55.913'<br>E23°54.073' | 2010 – 2011                     | O (n= 7)  | 0.06  | 250  | 48-108   | 75  | 8.1-8.8  | 8.5  |
| L. Băilor Co-jocna      | R   | Hyper-saline 3 | N46°44.907'<br>E23°50.441' | 2010 – 2011                     | O (n= 3)  | 0.24  | 350  | 89-133   | 118 | 8.2-8.6  | 8.4  |
| L Durgău Co-jocna       | R   | Hyper-saline 4 | N46°44.836'<br>E23°50.442' | 2010 – 2011                     | O (n= 4)  | 0.24  | 920  | 69-142   | 133 | 7.4-8.6  | 8.1  |
| L. Tarzan               | R   | Hyper-saline 5 | N46°34.472'<br>E23°48.549' | 2010 – 2011                     | O (n= 10) | 0.36  | 490  | 32-61    | 42  | 7.1-9.2  | 7.9  |
| L. Ocnei                | R   | Hyper-saline 6 | N46°35.158'<br>E23°47.282' | 2010 – 2011                     | O (n= 7)  | 0.21  | 1200 | 68-280   | 123 | 7.1-8.9  | 8.2  |
| L. Rotund               | R   | Hyper-saline 7 | N46°35.099'<br>E23°47.210' | 2010 – 2011                     | O (n= 4)  | 0.06  | 330  | 27-100   | 72  | 8.1-8.6  | 8.4  |
| L. Fără Fund            | R   | Hyper-saline 8 | N45°52.578'<br>E24°04.064' | 2010 – 2011                     | O (n= 7)  | 0.17  | 600  | 101-330  | 231 | 6.4-9.4  | 7.7  |
| L. Ursu                 | R   | Hyper-saline 9 | N46°36.226'<br>E25°05.164' | 2013 – 2015                     | O (n= 17) | 4     |      | 20-348   | 160 | 6.6-9.2  | 8.1  |
| L. Neusiedl, open water | H/A | Turbid soda 1  | N47°46.228'<br>E16°43.298' | 2004, 2008-2009, 2015-2016      | R (n= 49) | 13800 | 130  | 1.7-3    | 2.2 | 8.3-9.7  | 9.0  |
| L. Neusiedl, reed belt  | H/A | Humic soda 1   | N47°41.100'<br>E16°42.173' | 2004, 2008-2009, 2015-2016      | R (n= 65) | 17200 | 110  | 1-5      | 2.3 | 7.8-9.3  | 8.6  |
| Sósér pan               | H   | Humic soda 2   | N46°47.341'<br>E19°8.679'  | 2013-2014, 2016-2017            | R (n= 35) |       | 20   | 1.3-23.6 | 5.3 | 8.0-10.1 | 9.1  |
| Fehér-szék pan          | H   | Turbid soda 2  | N46°48.448'<br>E19°11.221' | 2001, 2013-2014                 | R (n= 33) | 10    | 25   | 0.9-12.7 | 5.2 | 8.3-10   | 9.1  |
| Büdös-szék pan          | H   | Turbid soda 3  | N46°51.980'<br>E19°10.153' | 2005-2007, 2014                 | R (n= 26) | 43    | 10   | 1.6-9.2  | 5.1 | 8.7-9.9  | 9.4  |
| Böddi-szék pan          | H   | Turbid soda 4  | N46°46.061'<br>E19°8.726'  | 2005-2007, 2013-2014            | R (n= 50) | 198   | 12   | 1.4-31   | 8.7 | 8-10     | 9.4  |
| Kelemen-szék pan        | H   | Turbid soda 5  | N46°47.542'<br>E19°10.647' | 2001-2002, 2006-2007, 2013-2014 | R (n= 43) | 190   | 23   | 1.5-22.8 | 7.3 | 8.7-10.2 | 9.4  |
| Zab-szék pan            | H   | Turbid soda 6  | N46°50.190'<br>E19°10.283' | 2001-2002, 2006-2007, 2013-2017 | R (n= 57) | 182   | 20   | 2.1-36   | 8.6 | 8.9-10.2 | 9.6  |
| Slano Kopovo pan        | S   | Turbid soda 7  | N45°37,548'<br>E20°12,521' | 2005                            | O (n=1)   | 119   | 30   |          | 8.9 |          | 3.22 |
| Rusanda pan             | S   | Turbid soda 8  | N45°30,742'<br>E20°18,113' | 2005                            | O (n=1)   | 161   | 20   |          | 9.3 |          | 10.4 |

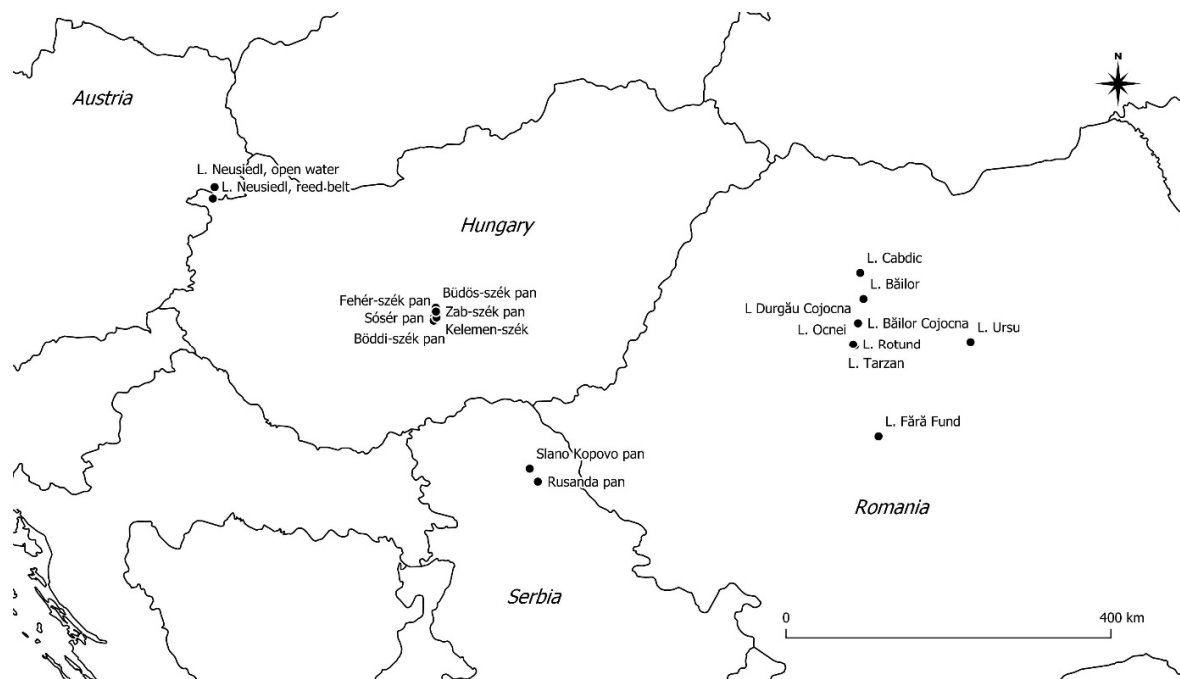

**Figure S1.** Map of the studied soda and hypersaline lakes.

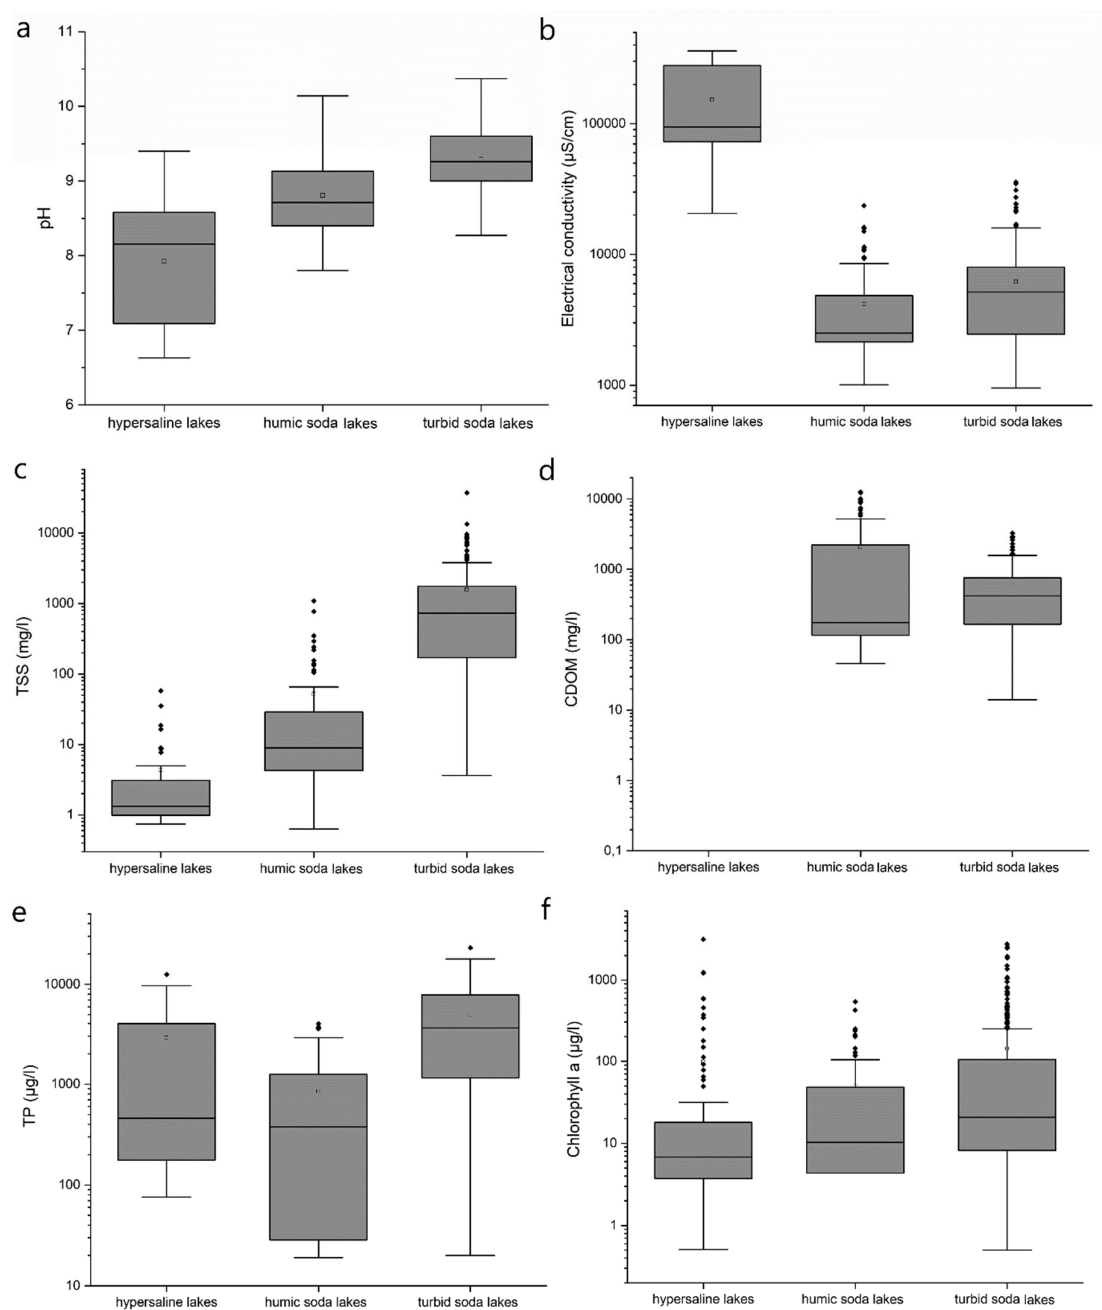

**Figure S2.** Selected environmental parameters [pH (a), electrical conductivity (b), TSS (c), CDOM (d), TP (e) and chlorophyll a (f) concentration] of the studied soda and hypersaline lakes. Abbreviations: TSS (total suspended solids), CDOM (coloured dissolved organic matter), TP (total phosphorous). The average values are represented as black line. Out-of-range values are shown as dots.

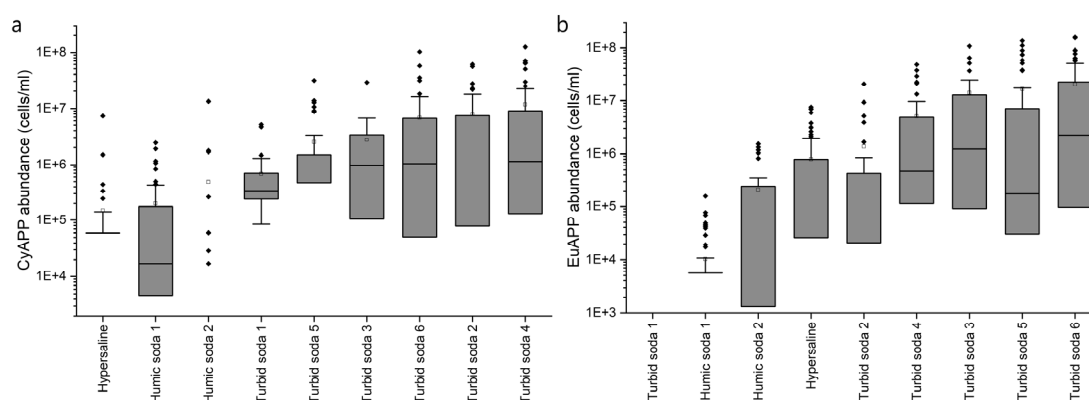

**Figure S3.** Abundance of picocyanobacteria (a) and picoeukaryotes (b) in the studied soda and hypersaline lakes (Re-analysis of data from references detailed in Table S1, expanded with unpublished results).

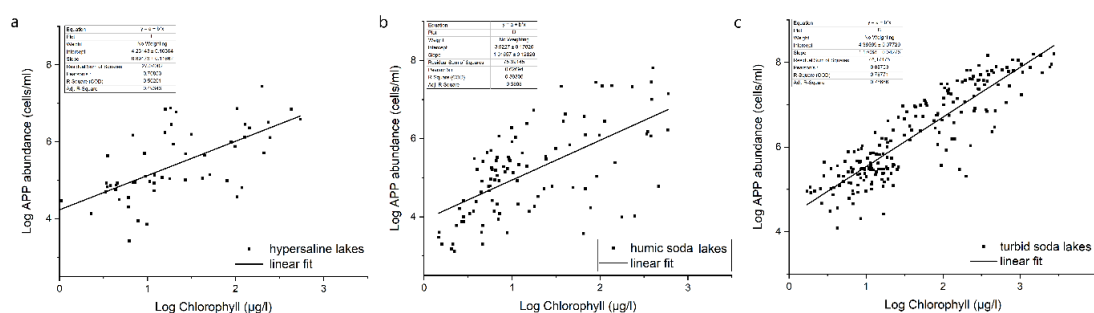

**Figure S4.** Relationship between APP abundance and chlorophyll *a* concentration in the studied hypersaline (a), humic (b) and turbid (c) soda lakes (Re-analysis of data from references detailed in Table S1, expanded with unpublished results).

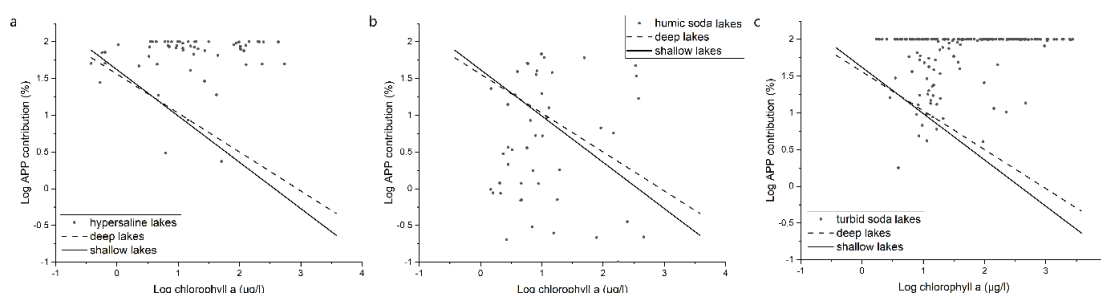

**Figure S5.** Relationship between APP contribution to total phytoplankton biomass and chlorophyll *a* concentration in the studied hypersaline (a), humic (b) and turbid (c) soda lakes (Re-analysis of data from references detailed in Table S1, expanded with unpublished results).

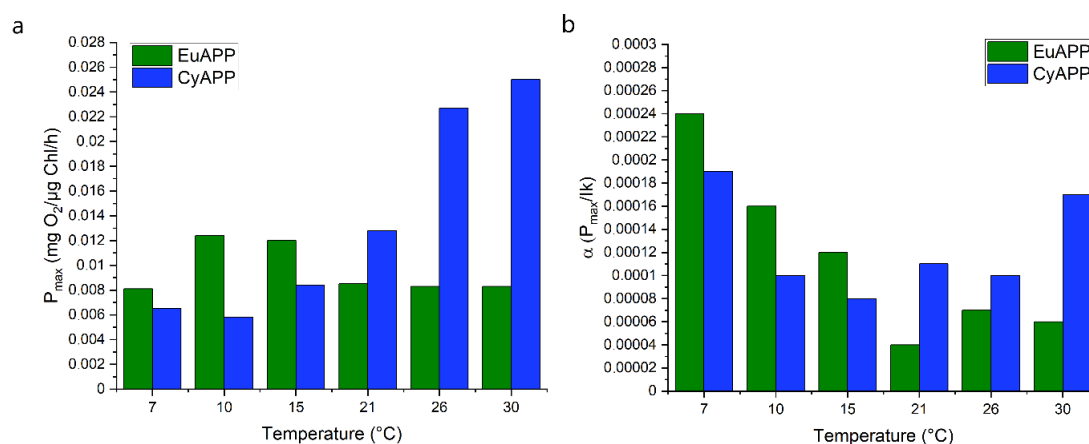

**Figure S6.** Maximum photosynthetic rate (a) and light utilization parameter (b) of a picoeukaryotic (EuAPP) and a picocyanobacterial (CyAPP) strain at different temperatures (data from Somogyi et al., 2009).

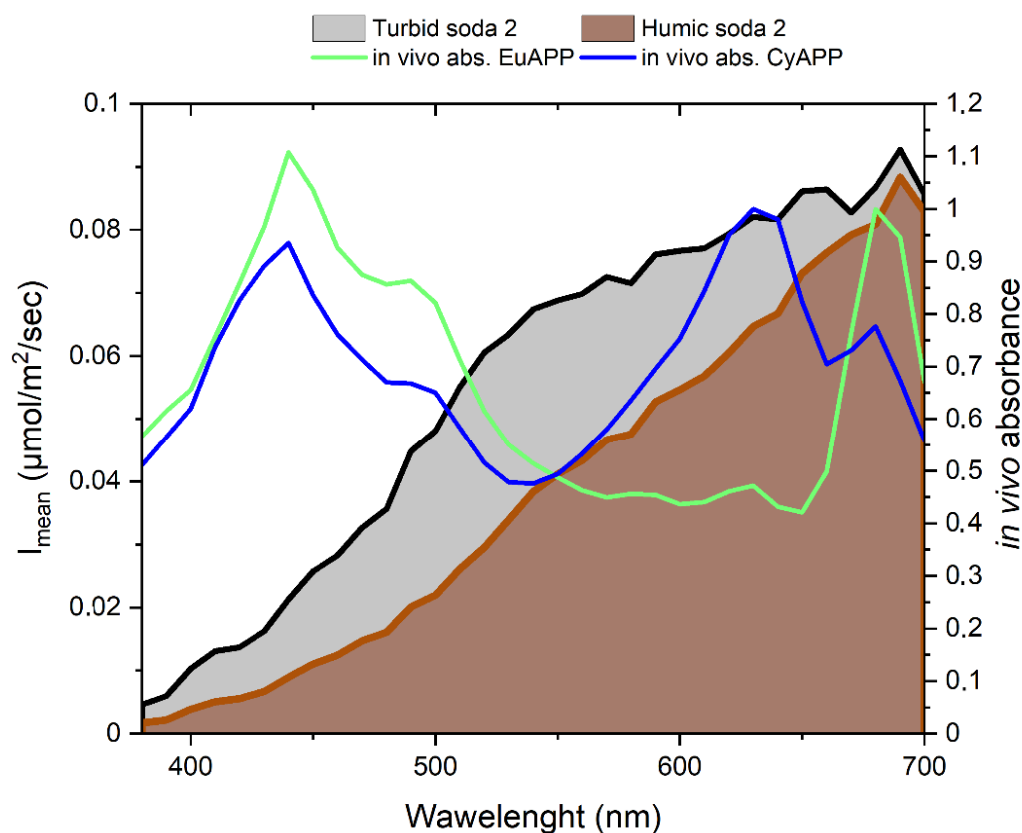

**Figure S7.** Spectral distribution of mean water column irradiance ( $I_{mean}$ ) in a turbid and in a humic soda lake and *in vivo* absorbance spectra of a picoeukaryotic (EuAPP) and a picocyanobacterial (CyAPP) strain (Unpublished results).

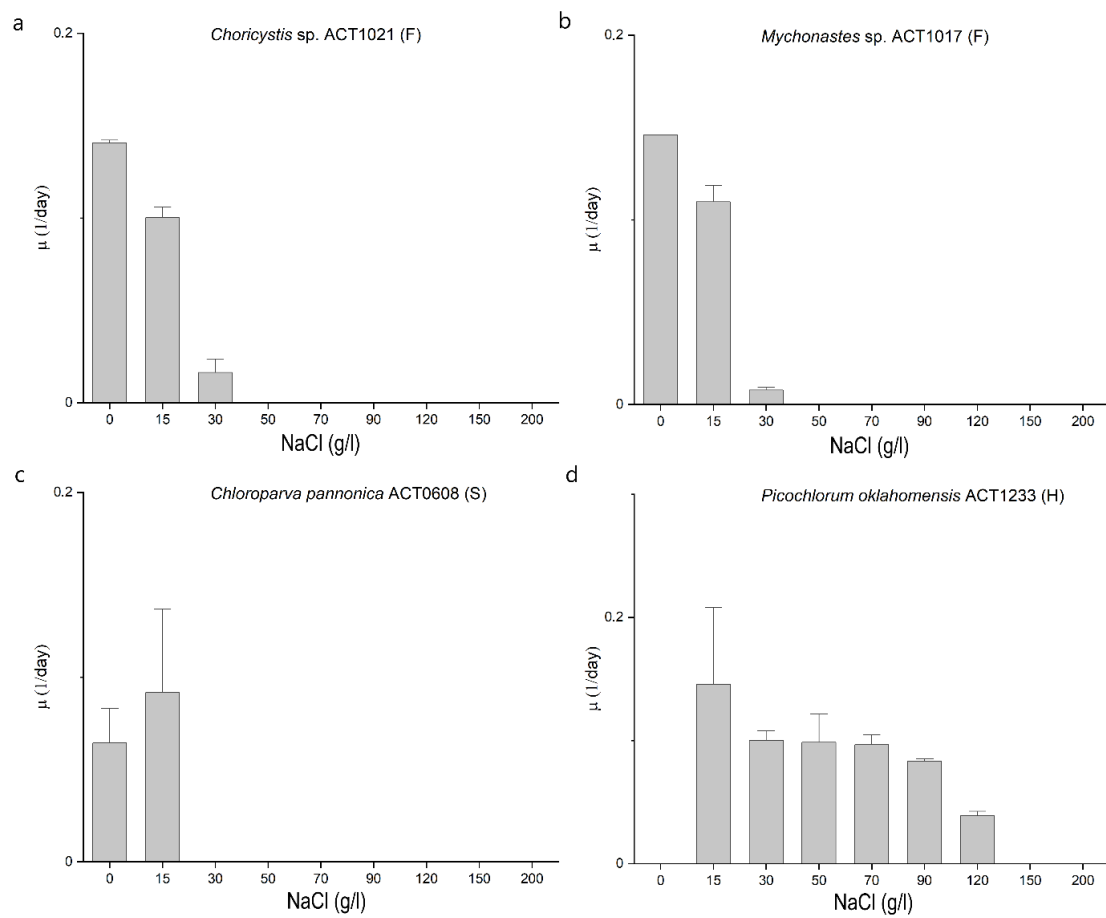

**Figure S8.** Growth rate of picoeukaryotic algal strains (a: *Choricystis* sp., b: *Mychonastes* sp., c: *Chloroparva pannonica*, d: *Picochlorum oklahomense*) isolated from freshwater (F), soda (S) and hypersaline (H) environments along with salinity. Isolates were grown on a Johnson Medium (Johnson et al., 1968) containing 0–200 g/l NaCl under 130  $\mu\text{mol}/\text{m}^2/\text{sec}$  in a 14:10 hour light: dark cycle at 26 °C (Unpublished results).
